# Supplementary material
Source: PubMed Central journal article supplement (PMC8286257)
Supplement: 41408_2021_525_MOESM1_ESM.pdf [file 41408_2021_525_MOESM1_ESM.pdf]

Figure 1A

# Follicular W/W GELF Criteria Transformation & Therapy w/ Death as a Competing Risk

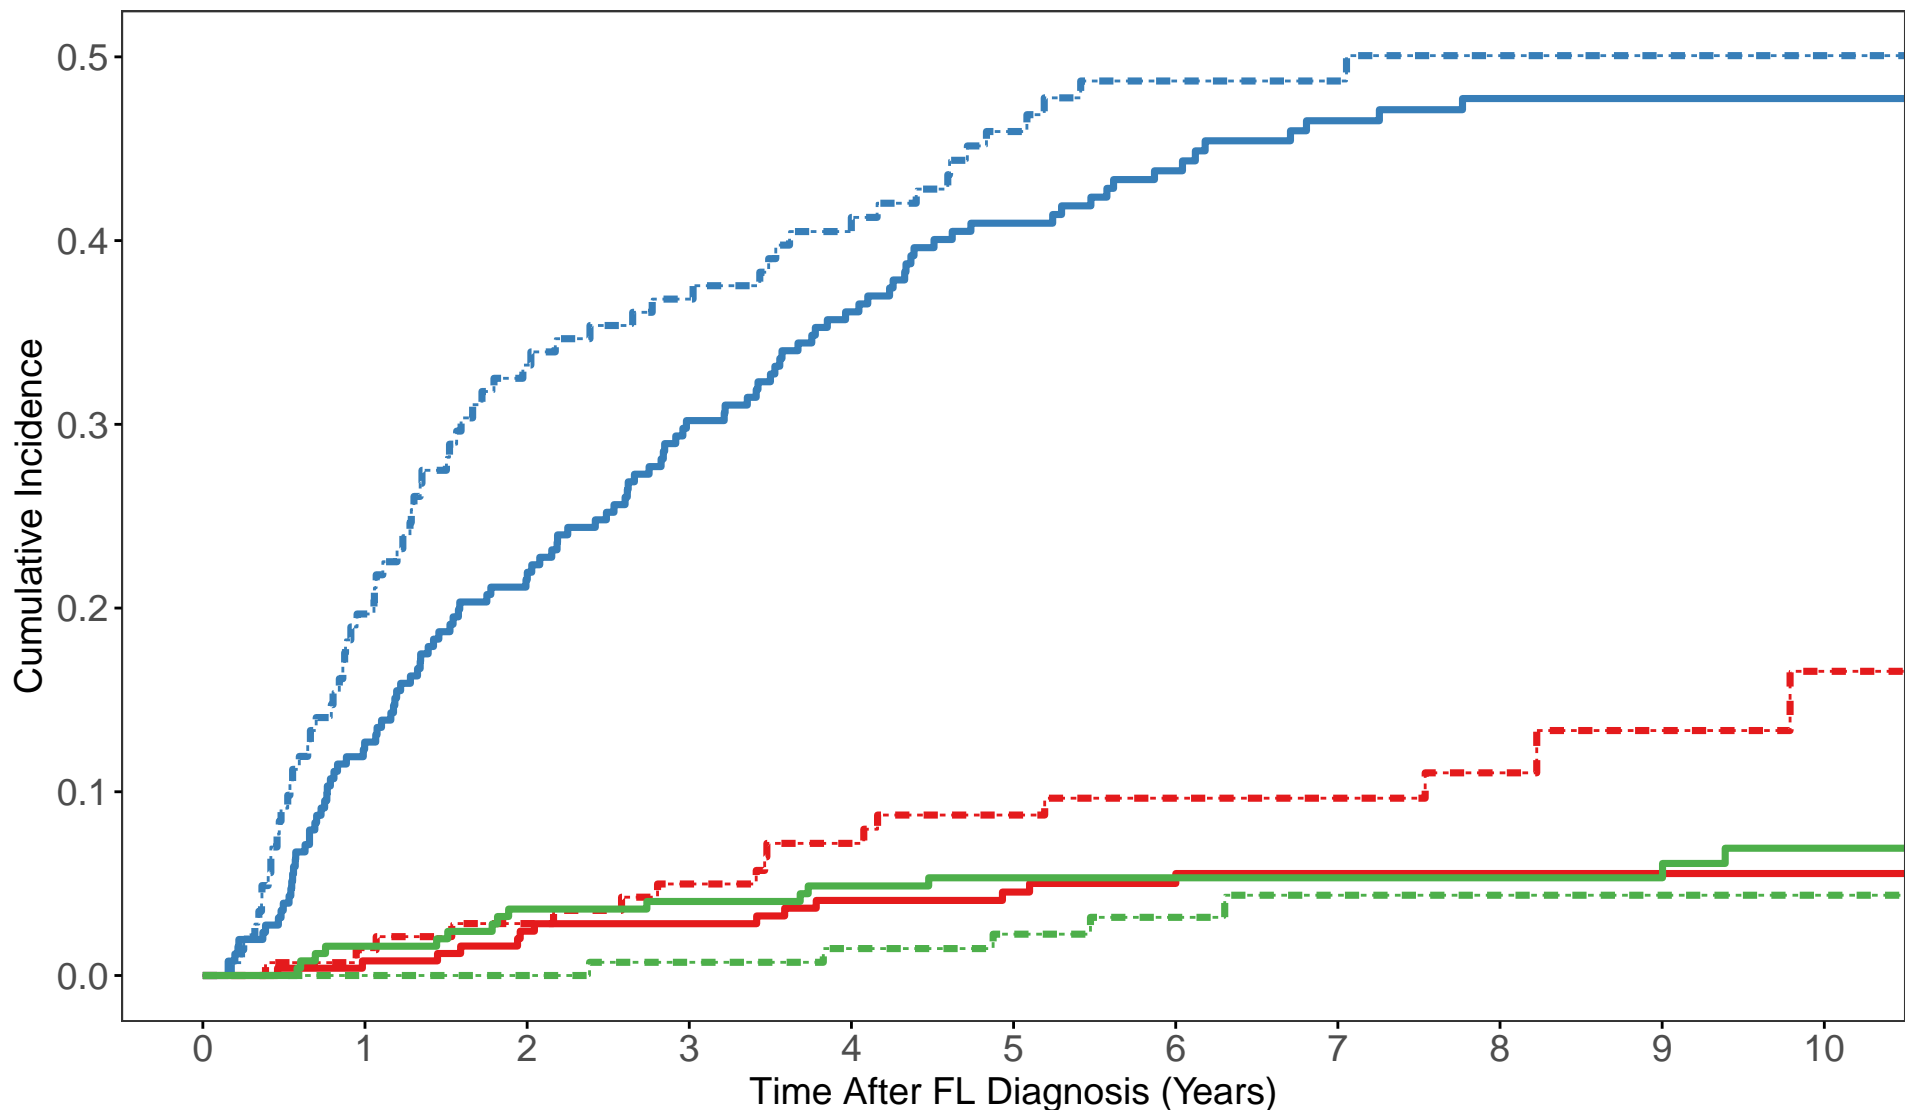

— GELF:Negative    - - - GELF:Positive    - - - Transformation    — Therapy    — Death

Number at risk

401    324    268    228    193    155    121    99    77    63    49

Figure 1B

# Follicular W/W GELF Criteria Cause of Death Competing Risks

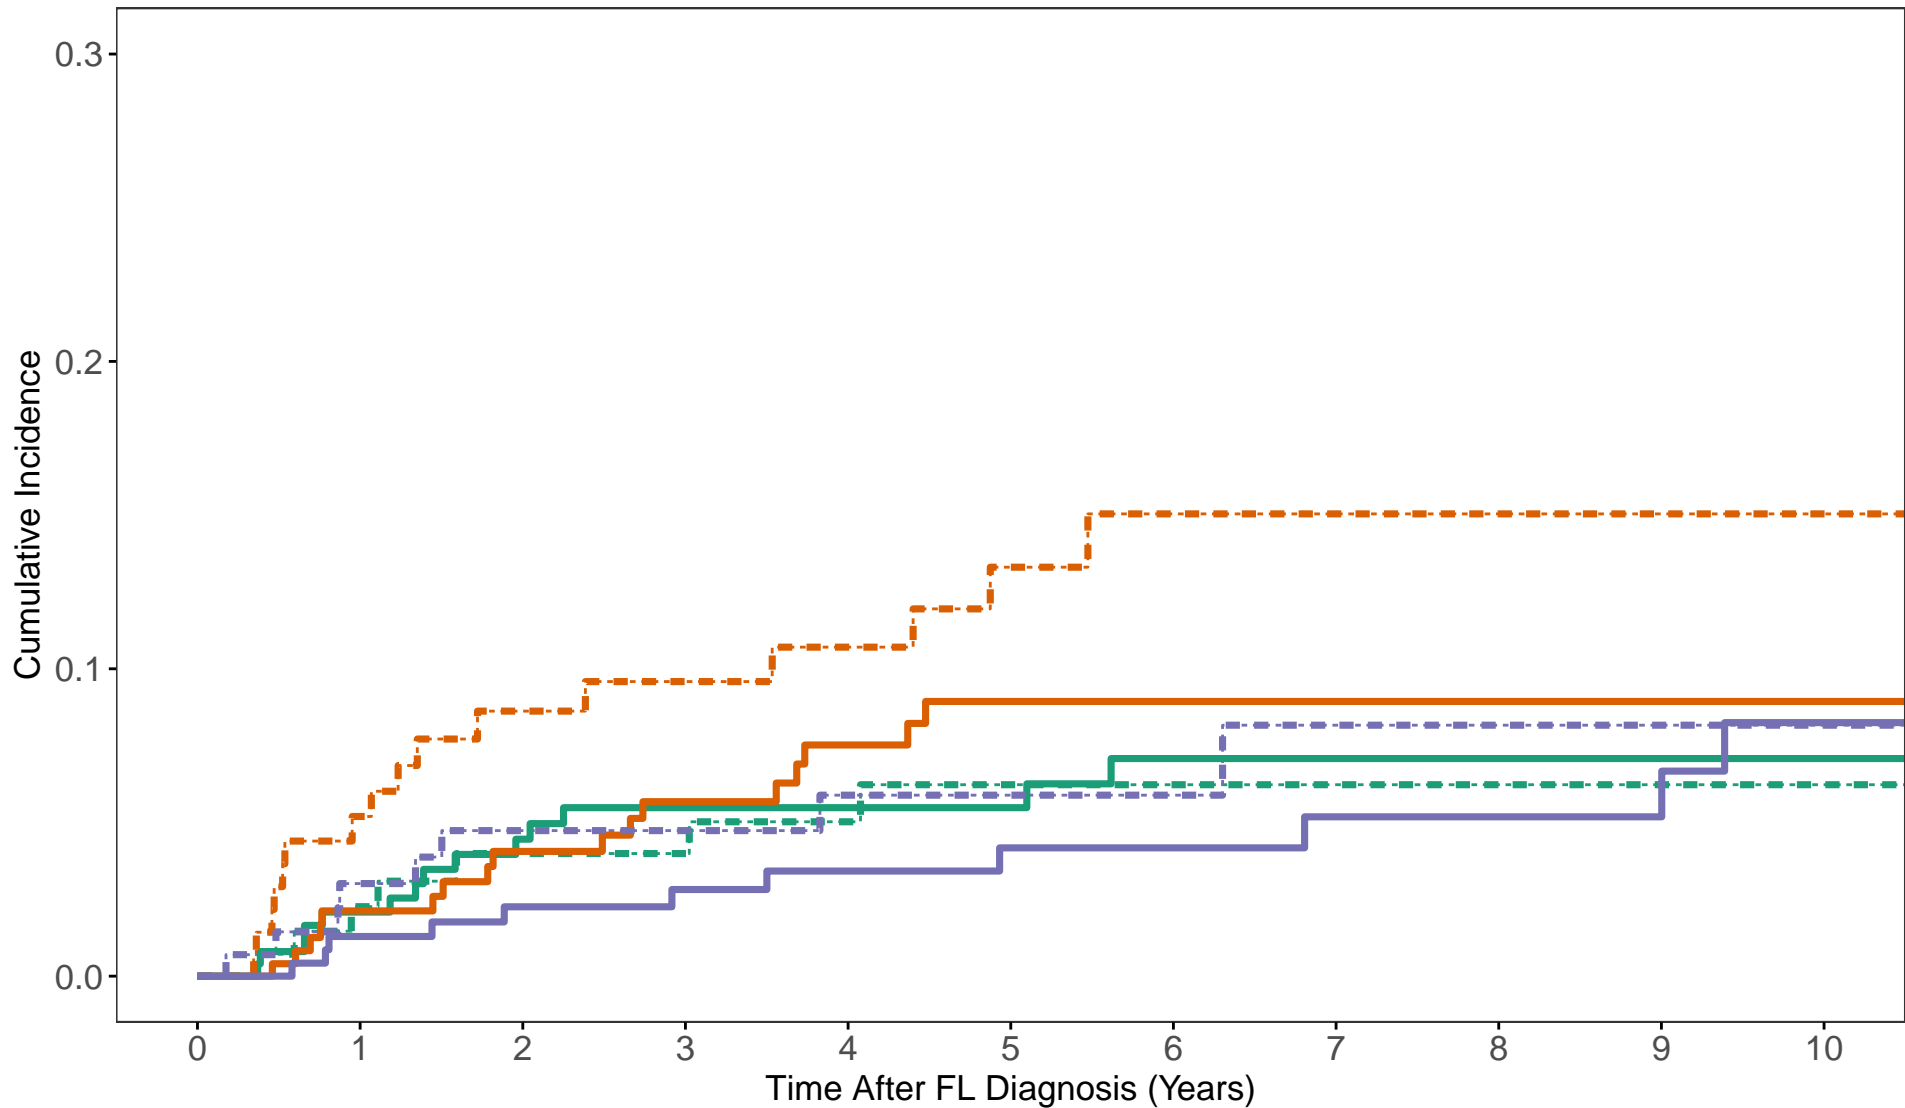

— GELF:Negative    - - - GELF:Positive    — Lymphoma-Related    — Non-Lymphoma-Related    — Unknown

Number at risk

401    324    268    228    193    155    121    99    77    63    49

Figure 2A

# Follicular W/W BNLI Criteria Transformation & Therapy w/ Death as a Competing Risk

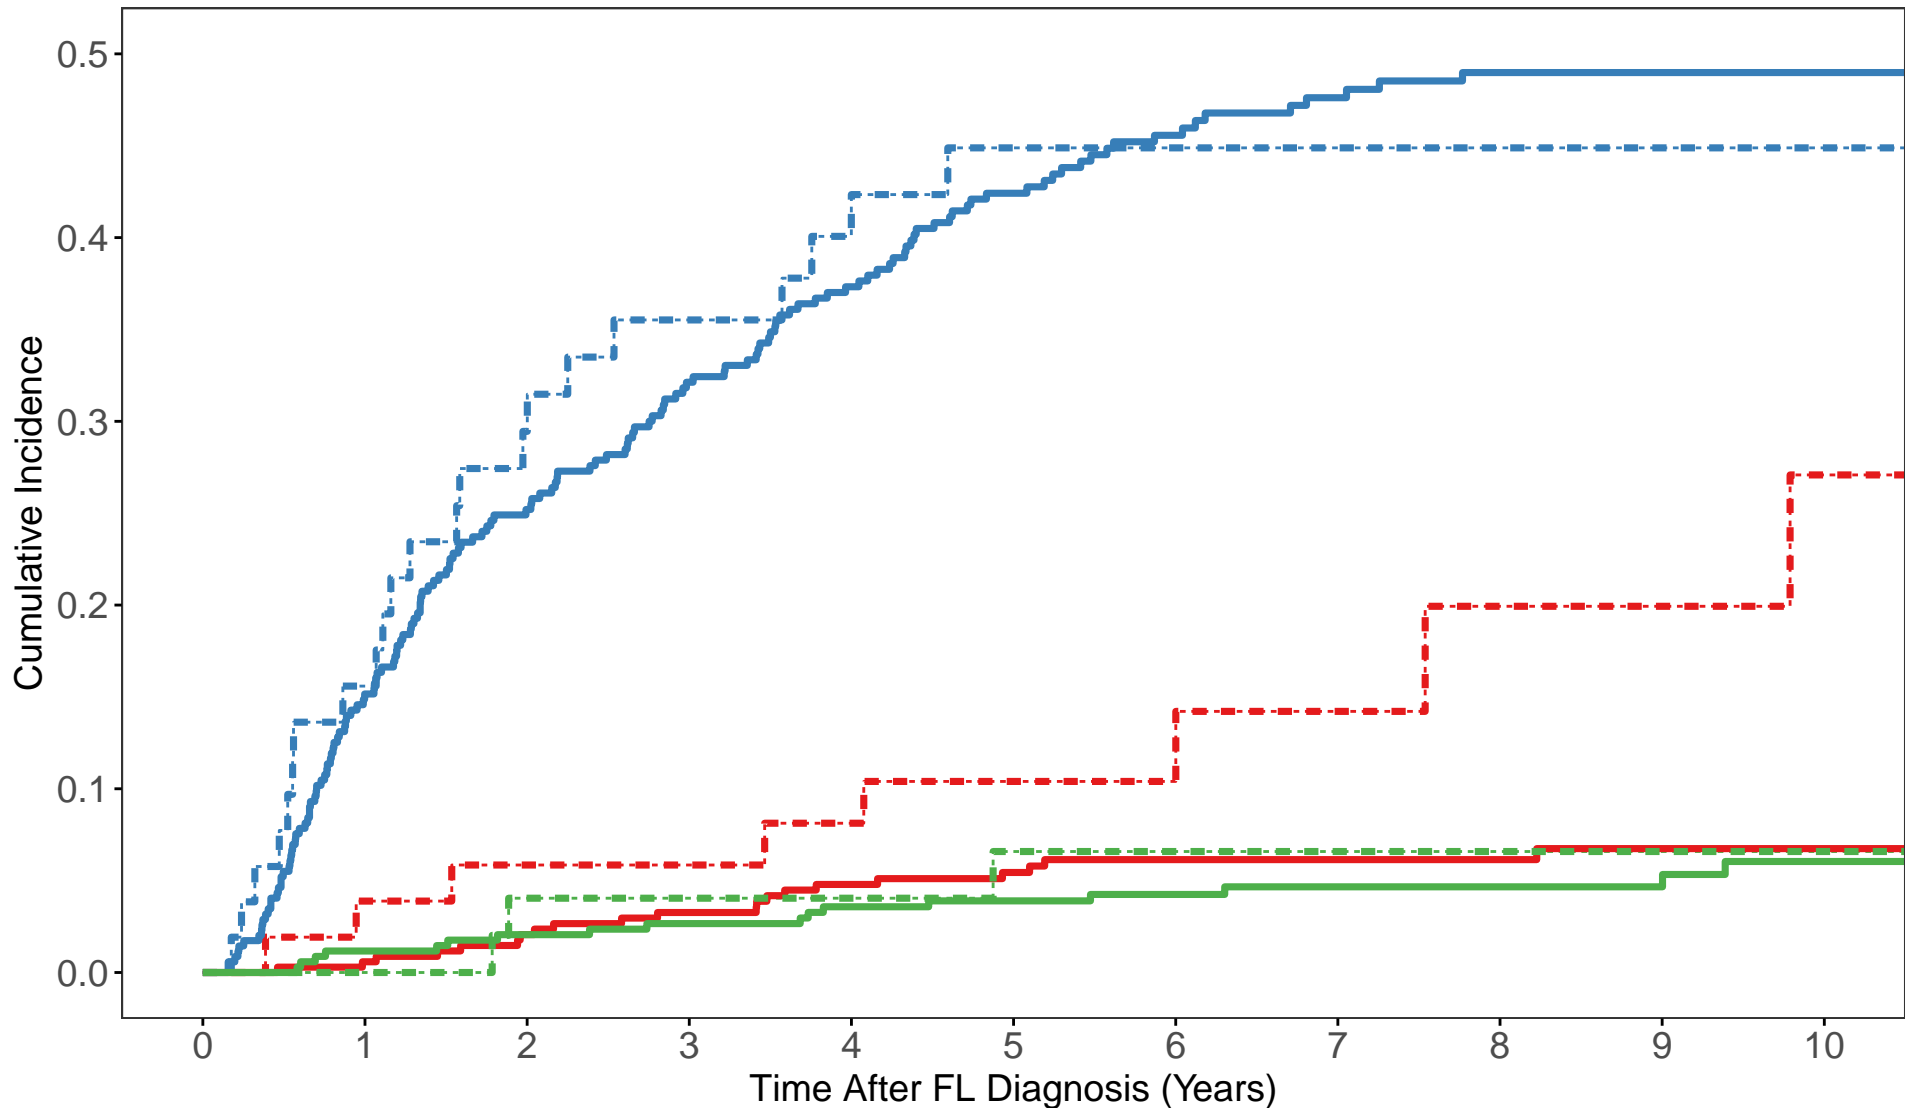

— Transformation — Therapy — Death — BNLI:Negative - - - BNLI:Positive

Number at risk

401 324 268 228 193 155 121 99 77 63 49

Figure 2B

# Follicular W/W BNLI Criteria Cause of Death Competing Risks

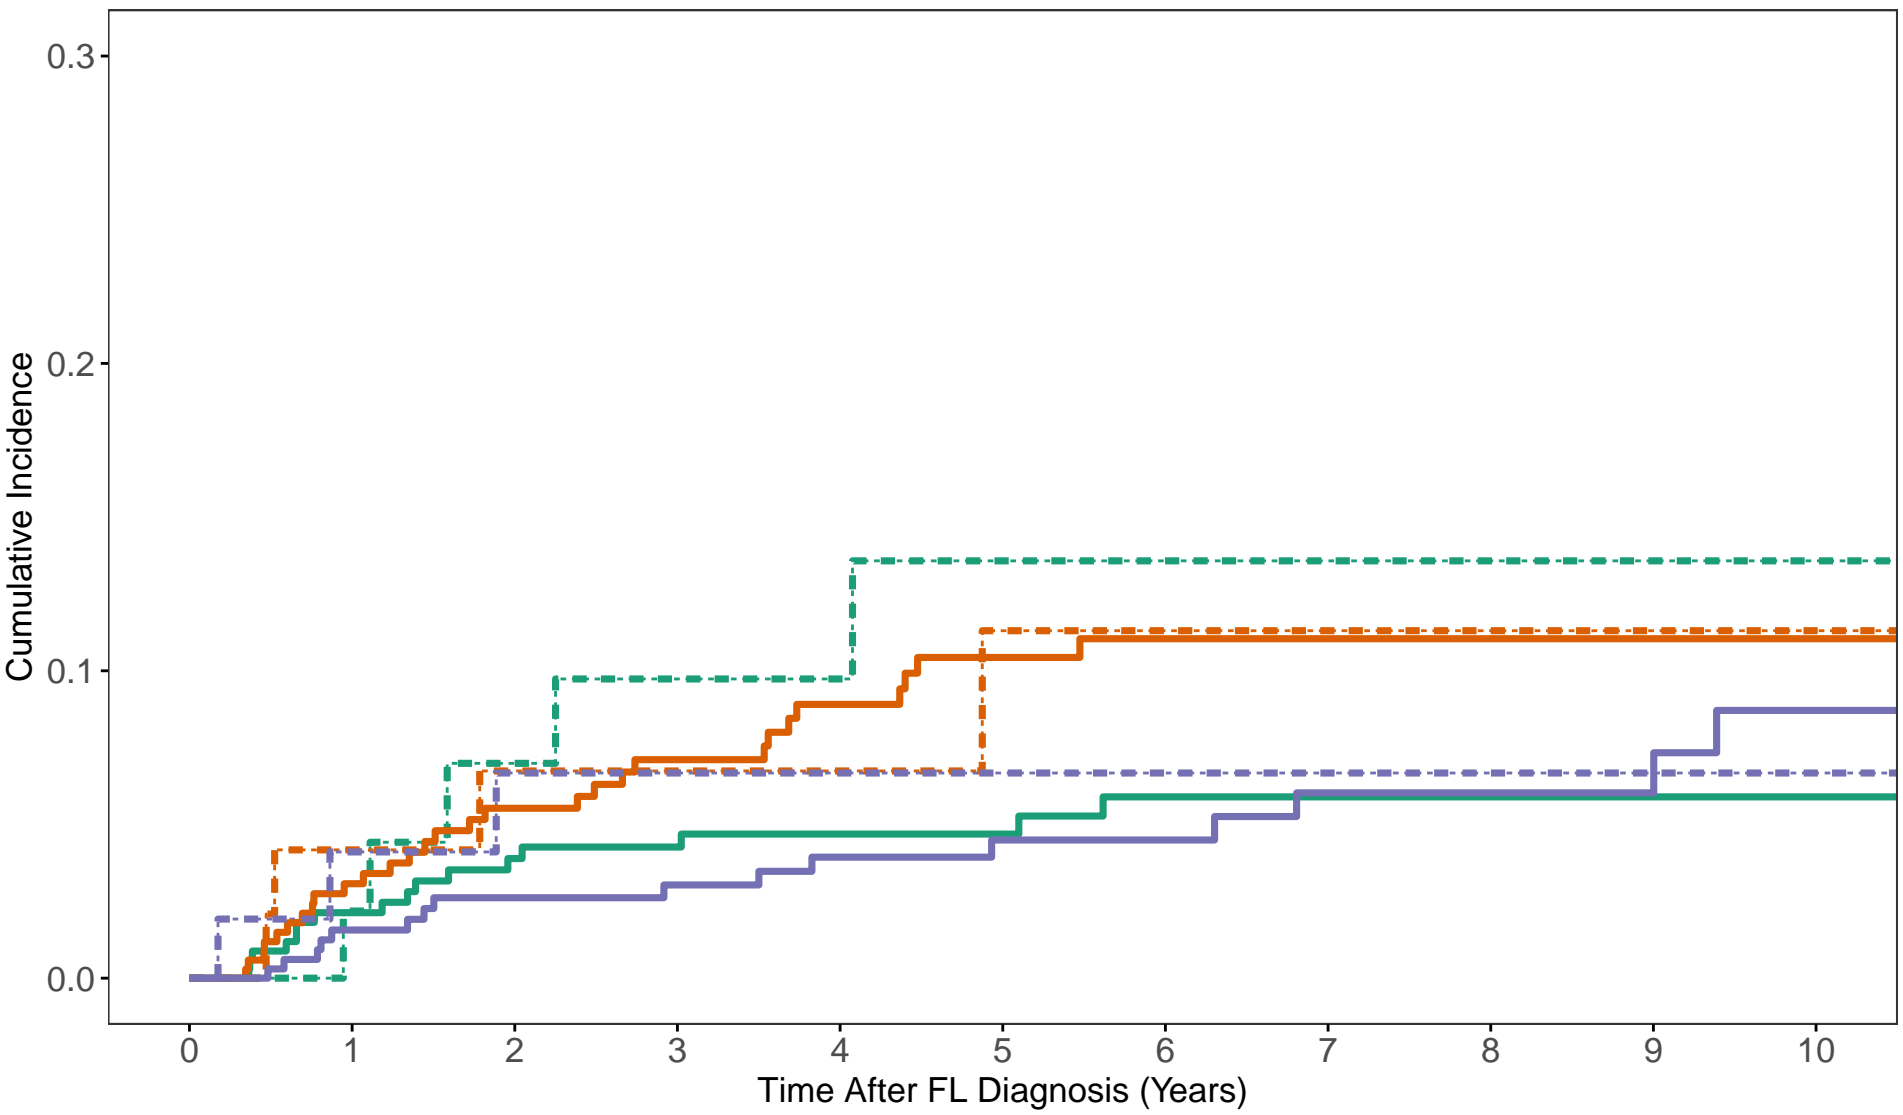

— Lymphoma-Related    — Non-Lymphoma-Related    — Unknown    — BNLI:Negative    - - - BNLI:Positive

Number at risk

401    324    268    228    193    155    121    99    77    63    49

Figure 3A

# Follicular W/W GITMO Criteria Transformation & Therapy w/ Death as a Competing Risk

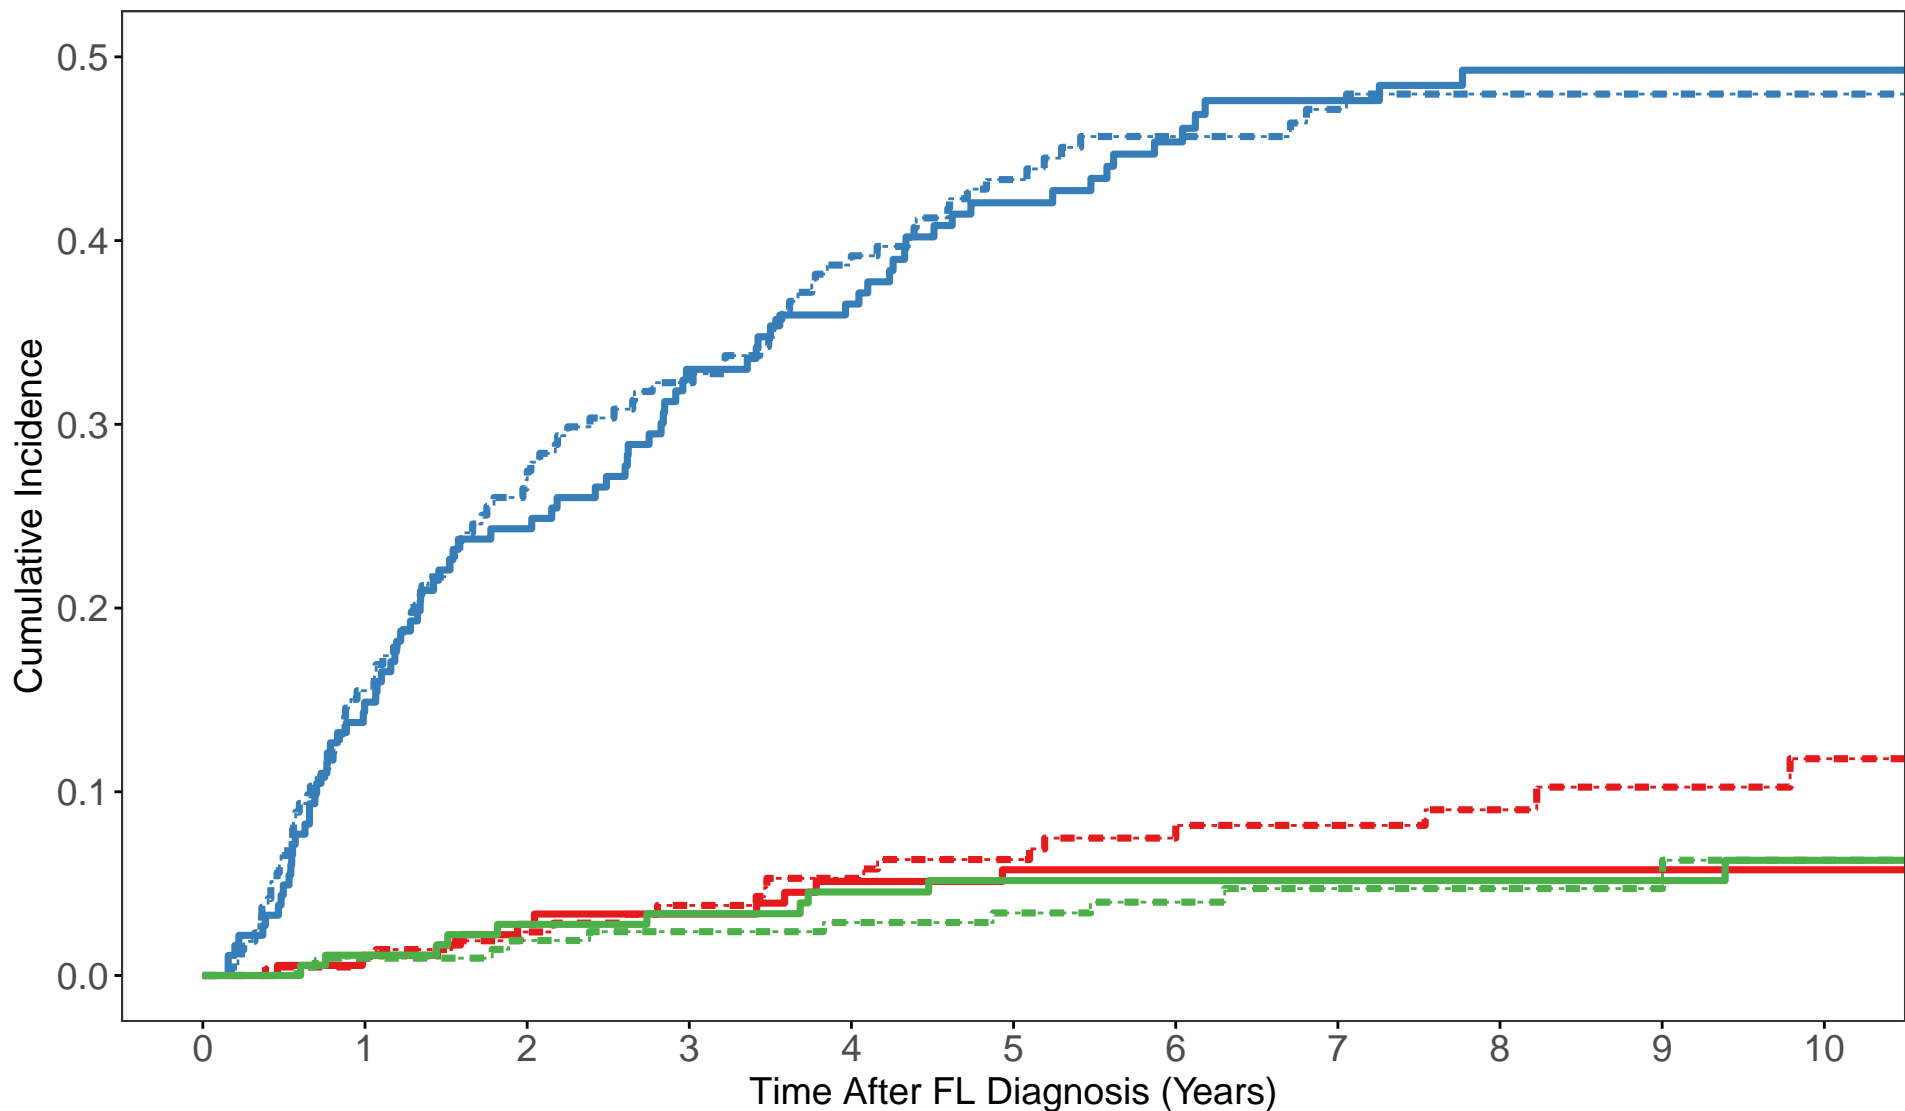

— GITMO:Negative    - - - GITMO:Positive    — Transformation    — Therapy    — Death

Number at risk

401    324    268    228    193    155    121    99    77    63    49

Figure 3B

### Follicular W/W GITMO Criteria Cause of Death Competing Risks

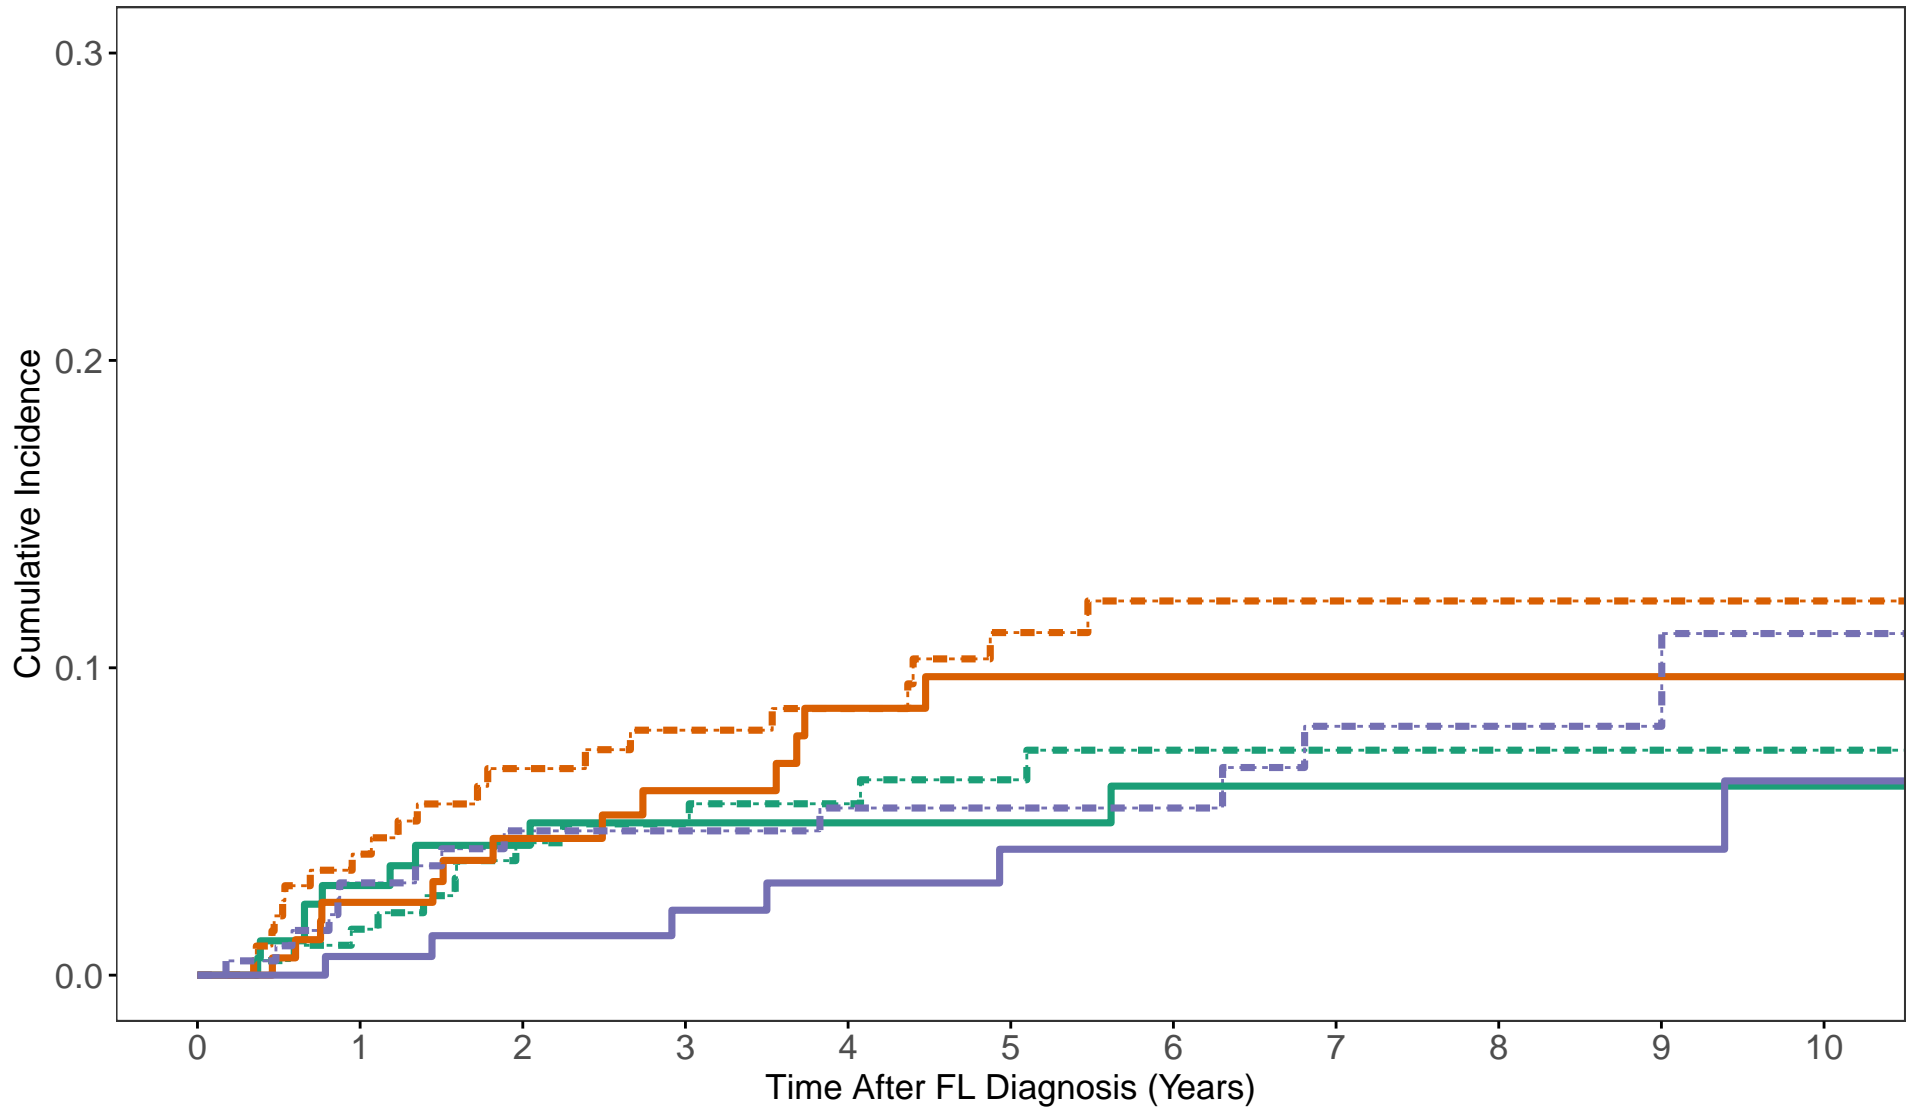

Number at risk

401

324

268

228

193

155

121

99

77

63

49
